# Supplementary material
Source: PubMed Central journal article supplement (PMC3912828)
Supplement: supp_141.4.816_DEV103036.pdf [file supp_141.4.816_DEV103036.pdf]

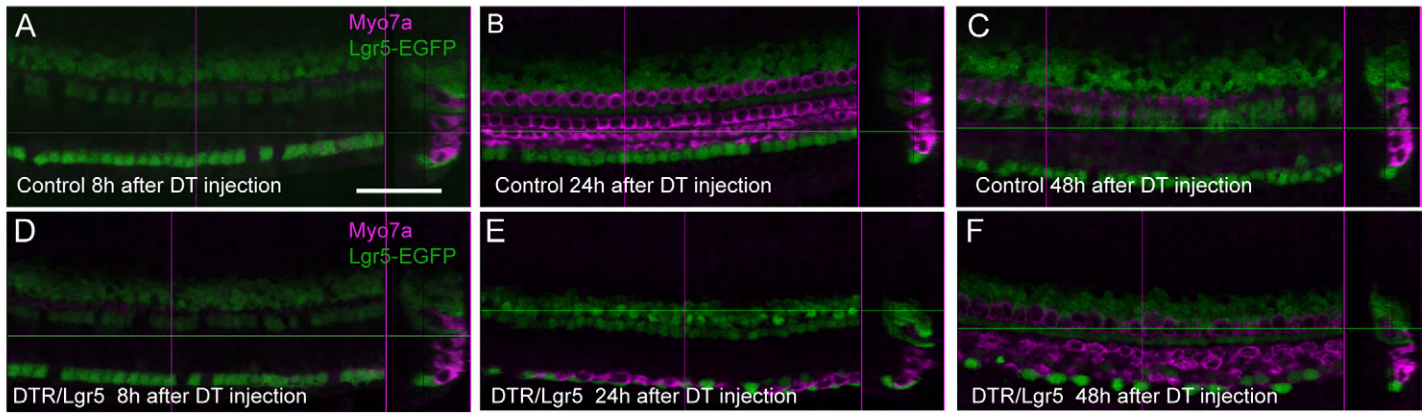

**Fig. S1. Expression of Lgr5 after HC ablation in the neonatal mouse cochlea.** Representative confocal images of Lgr5-EGFP expression (green) in the apical turn of control ( $Pou4f3^{+/+}; Lgr5^{CreER/+}$ ) (A-C) and  $Pou4f3^{DTR/+}; Lgr5^{CreER/+}$  cochleae (D-F) 8, 24, and 48 hours after DT injection at P1. HCs are labeled by myo7a (magenta). Scale Bar: 50µm.

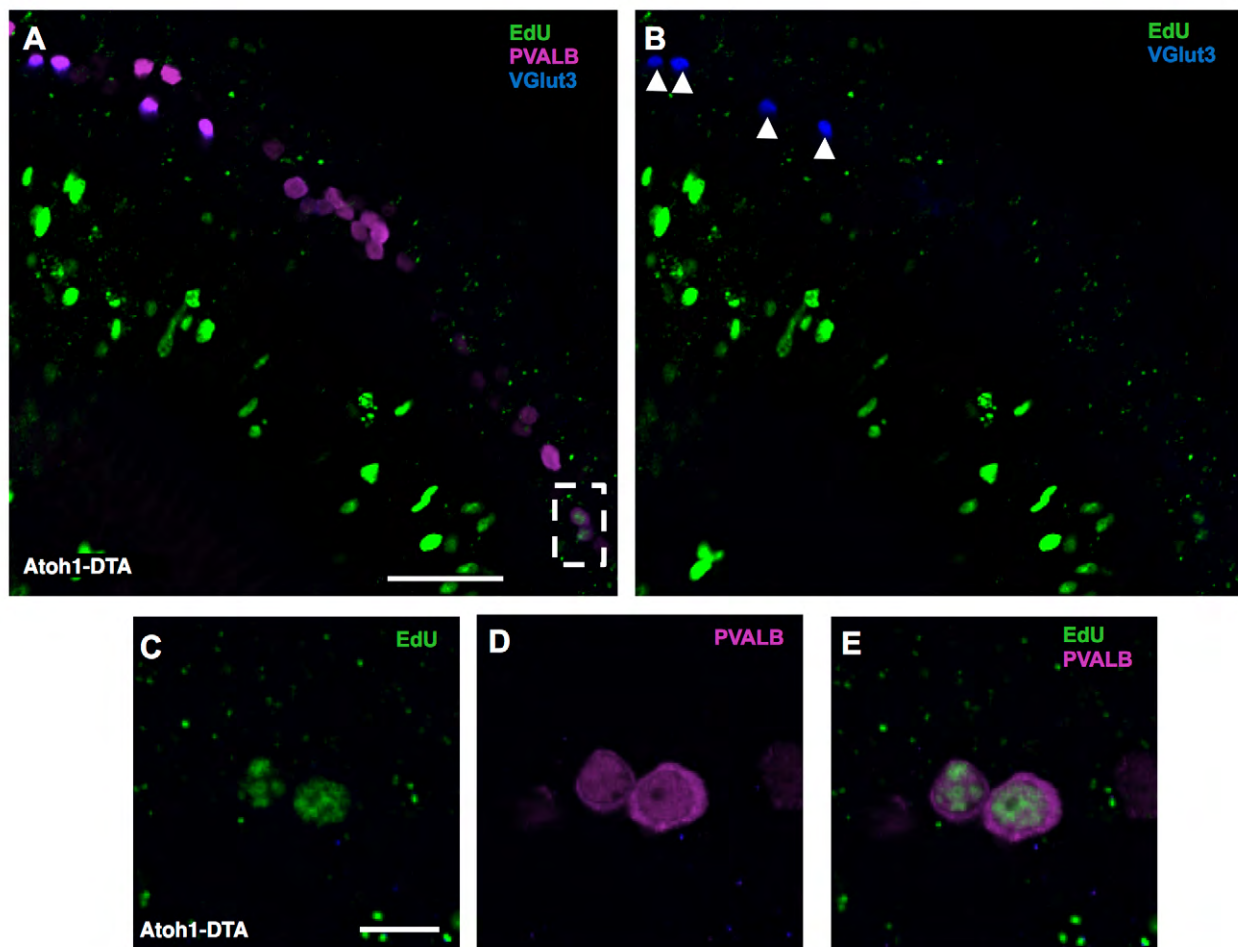

**Fig. S2. Regenerated HCs do not express the inner HC marker VGlut3.** Representative confocal images of EdU+ (green) HCs in the apical turn of Atoh1-DTA mice at P10 after EdU injection at P4. EdU+ HCs were co-labeled with the non-selective HC marker parvalbumin (PVALB, magenta), but did not express the inner HC marker, VGlut3 (blue). C-D High magnification of square in A. Arrowheads in B label VGlut3+ cells. Scale bars: in A-B=50µm, in C-E=10µm.

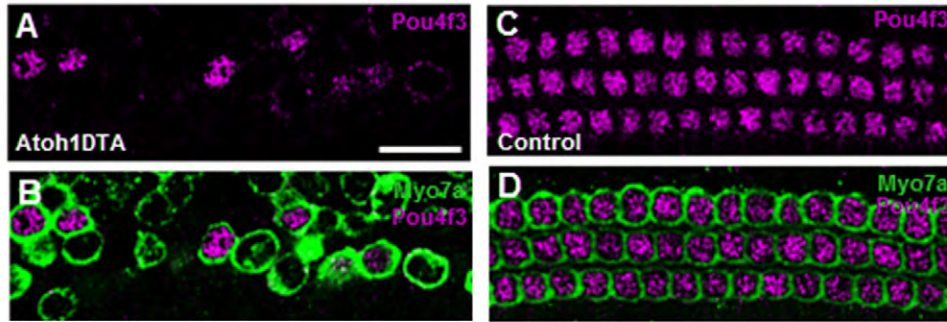

**Fig. S3. Lack of Pou4f3 expression in regenerated HCs.** Representative confocal images of myo7a+ (green) cells that express the HC survival factor, Pou4f3 (magenta), at P6 in the apical turn of Atoh1DTA (A-B) and control mice (lacking either the Cre or DTA allele) (C-D). Scale Bar=50μm.

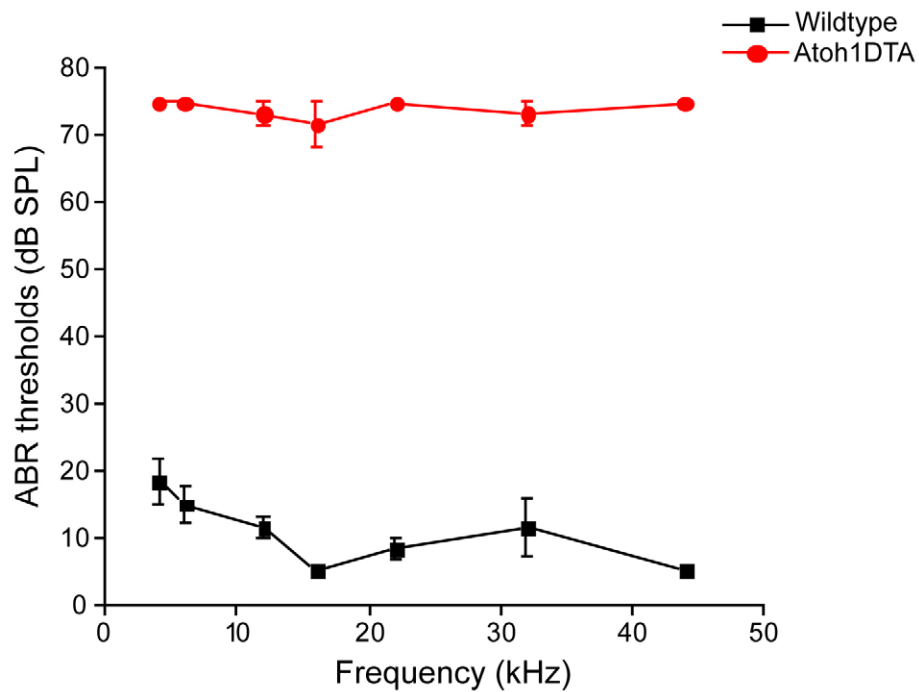

**Fig. S4. Hearing loss after hair cell ablation.** (A) After HCs were ablated at P0-1, P30 Atoh1DTA mice displayed elevated thresholds for auditory brainstem responses (ABR) in comparison to wild-type littermates ( $n=3$  for each group).

**Table S1. Genotyping primers**

|                                        |                             |
|----------------------------------------|-----------------------------|
| <b>ROSA26<sup>DTA</sup> genotyping</b> |                             |
| Forward primer                         | 5' TGACGATGATTGGAAAGGGT 3'  |
| Reverse primer                         | 5' TGAGCACTACACGCGAAGCA 3'  |
| <b>Hes5-nlsLacZ genotyping</b>         |                             |
| Forward primer                         | 5' CCGAAATCCCGAATCTCTATC 3' |
| Reverse primer                         | 5' ATCACACTCGGGTGATTACGA 3' |
| <b>Pou4f3 DTR genotyping</b>           |                             |
| Pou4f3 1566 primer                     | 5' CCGACGGCAGCAGCTTCATGG 3' |
| Pou4f3 1518 primer                     | 5' GTCAAAAAATGTGCCTTAGAG 3' |
| Pou4f3 1567 primer                     | 5' CACTTGGAGCGCGGAGAGCTA 3' |

The primers used for genotyping ROSA26<sup>DTA</sup> mice, Hes5-nlsLacZ mice, and Pou4f3<sup>DTR/+</sup> mice are listed. Genotyping for all other mouse lines has been previously described (see Methods).

**Table S2. Summary of fate mapping and mitotic labeling experiments**

**A. Fate mapping of SCs using Pou4f3<sup>DTR/+</sup>; Lgr5<sup>CreER/+</sup>; ROSA26<sup>CAG-tdTomato/+</sup> mice**

|                                           | <u>Cell ablation method</u> | <u>Age analyzed</u> | <u>n value</u> |
|-------------------------------------------|-----------------------------|---------------------|----------------|
|                                           | DTR: DT inj. at P1          | P7                  | 4              |
| Myo7a+/tdTomato+ cells (whole turn)       |                             |                     |                |
|                                           | Apical                      | Middle              | Base           |
| CTL                                       | 12.0 ± 1.5                  | 2.0 ± 0.7           | 0.5 ± 0.3      |
| DTR                                       | 99.0 ± 4.6***               | 22.8 ± 6.5***       | 2.3 ± 0.9*     |
| Myo7a+/Sox2+ cells (whole turn)           |                             |                     |                |
|                                           | Apical                      | Middle              | Base           |
| CTL                                       | --                          | --                  | --             |
| DTR                                       | 34.3 ± 3.8                  | 8.0 ± 2.3           | --             |
| Myo7a+/Sox2+/tdTomato+ cells (whole turn) |                             |                     |                |
|                                           | Apical                      | Middle              | Base           |
| CTL                                       | --                          | --                  | --             |
| DTR                                       | 18.3 ± 3.0                  | 3.3 ± 1.3           | --             |

**B. Fate mapping of SCs using Atoh1DTA; Hes5-nlsLacZ<sup>+/-</sup> mice**

|                                 | <u>Cell ablation method</u> | <u>Age analyzed</u> | <u>n value</u> |
|---------------------------------|-----------------------------|---------------------|----------------|
|                                 | DTA: Tam inj. at P0/P1      | P2                  | 3              |
| Myo7a+/LacZ+ cells (whole turn) |                             |                     |                |
|                                 | Apical                      | Middle              | Base           |
| CTL                             | --                          | --                  | --             |
| Atoh1DTA                        | 58.3 ± 30.2**               | 9.3 ± 7.9           | 1.3 ± 1.3      |

**C. Mitotic labeling using Pou4f3<sup>DTR/+</sup> mice**

|                                                                  | <u>Cell ablation method</u> | <u>EdU injection</u> | <u>Age analyzed</u> | <u>n value</u> |
|------------------------------------------------------------------|-----------------------------|----------------------|---------------------|----------------|
|                                                                  | DTR: DT inj. at P1          | P3, P4, & P5         | P7                  | 4-6            |
| Sox2+/EdU+/myo7a-negative cells (225 μm region counted per turn) |                             |                      |                     |                |
|                                                                  | Apical                      | Middle               | Base                |                |
| CTL                                                              | --                          | --                   | --                  |                |
| DTR                                                              | 13.2 ± 3.7                  | 5.8 ± 1.6            | 3.5 ± 1.5           |                |
| Myo7a+/EdU+ cells (whole turn)                                   |                             |                      |                     |                |
|                                                                  | Apical                      | Middle               | Base                |                |
| CTL                                                              | --                          | --                   | --                  |                |
| DTR                                                              | 11.0 ± 1.8                  | --                   | --                  |                |

Myo7a+/Sox2+/EdU+ cells (whole turn)

|     | Apical    | Middle | Base |
|-----|-----------|--------|------|
| CTL | --        | --     | --   |
| DTR | 4.7 ± 1.3 | --     | --   |

#### D. Mitotic labeling using Atoh1DTA mice

|                                       | Cell ablation method   |           | EdU injection | Age analyzed       | n value |
|---------------------------------------|------------------------|-----------|---------------|--------------------|---------|
|                                       | DTA: Tam inj. at P0/P1 |           | P2- P5        | 24h after EdU inj. | 3       |
| Sox2+/EdU+ cells (whole turn)         |                        |           |               |                    |         |
| CTL                                   | P2                     | P3        | P4            | P5                 |         |
| Apical                                | --                     | --        | --            | --                 |         |
| Middle                                | --                     | --        | --            | --                 |         |
| Base                                  | --                     | --        | --            | --                 |         |
| Atoh1DTA                              | P2                     | P3        | P4            | P5                 |         |
| Apical                                | 2.7 ± 1.8              | 1.7 ± 1.2 | 3.0 ± 2.1     | 2.7 ± 1.5          |         |
| Middle                                | --                     | 3.0 ± 2.1 | 2.0 ± 2.0     | 1.7 ± 1.7          |         |
| Base                                  | --                     | --        | 1.3 ± 1.3     | 5.3 ± 1.5          |         |
| Myo7a+/EdU+ cells (whole turn)        |                        |           |               |                    |         |
| CTL                                   | P2                     | P3        | P4            | P5                 |         |
| Apical                                | --                     | --        | --            | --                 |         |
| Middle                                | --                     | --        | --            | --                 |         |
| Base                                  | --                     | --        | --            | --                 |         |
| Atoh1DTA                              | P2                     | P3        | P4            | P5                 |         |
| Apical                                | 2.0 ± 2.0              | 3.3 ± 0.9 | 3.7 ± 2.3     | 1.0 ± 0.6          |         |
| Middle                                | --                     | --        | --            | --                 |         |
| Base                                  | --                     | --        | --            | --                 |         |
| Myo7a+/ Sox2+/EdU+ cells (whole turn) |                        |           |               |                    |         |
| CTL                                   | P2                     | P3        | P4            | P5                 |         |
| Apical                                | --                     | --        | --            | --                 |         |
| Middle                                | --                     | --        | --            | --                 |         |
| Base                                  | --                     | --        | --            | --                 |         |
| Atoh1DTA                              | P2                     | P3        | P4            | P5                 |         |
| Apical                                | 1.3 ± 1.3              | 1.7 ± 0.3 | 2.0 ± 1.2     | 1.0 ± 0.6          |         |
| Middle                                | --                     | --        | --            | --                 |         |
| Base                                  | --                     | --        | --            | --                 |         |

**E. Mitotic labeling and fate mapping in Pou4f3<sup>DTR/+</sup>; Lgr5<sup>CreER/+</sup>; ROSA26<sup>CAG-tdTomato/+</sup> mice**

|                                                    | <u>Cell ablation method</u> | <u>EdU injection</u> | <u>Age analyzed</u> | <u>n value</u> |
|----------------------------------------------------|-----------------------------|----------------------|---------------------|----------------|
|                                                    | DTR: DT inj. at P1          | P3, P4, & P5         | P7                  | 3-6            |
| Myo7a+/tdTomato+/EdU+ cells (whole turn)           |                             |                      |                     |                |
|                                                    | Apical                      | Middle               | Base                |                |
| CTL                                                | --                          | --                   | --                  |                |
| DTR                                                | 6.7 ± 0.6                   | --                   | --                  |                |
| Myo7a+/tdTomato+ cells (EdU-negative) (whole turn) |                             |                      |                     |                |
|                                                    | Apical                      | Middle               | Base                |                |
| CTL                                                | 9.8 ± 2.1                   | 1.3 ± 0.5            | 0.3 ± 0.5           |                |
| DTR                                                | 106.3 ± 14.8***             | 25.7 ± 5.5**         | 2.7 ± 1.5*          |                |

**F. Supporting cell counts in Pou4f3<sup>DTR/+</sup>; Lgr5<sup>CreER/+</sup>; ROSA26<sup>CAG-tdTomato/+</sup> mice**

|  | <u>Cell ablation method</u> | <u>Age analyzed</u> | <u>n value</u> |
|--|-----------------------------|---------------------|----------------|
|  | DTR: DT inj. at P1          | P7                  | 3-5            |

tdTomato+ organ of Corti cells (Myo7a+ and Sox2+/myo7a-negative cells lateral to GER) (225 µm region counted per turn)

|     | Apical      | Middle       | Base         |
|-----|-------------|--------------|--------------|
| CTL | 70.3 ± 1.5  | 64.7 ± 1.5   | 60.6 ± 1.6   |
| DTR | 64.9 ± 0.9* | 44.7 ± 1.4** | 40.7 ± 0.4** |

tdTomato+ organ of Corti supporting cells (Sox2+/myo7a-negative cells lateral to GER using IHC as reference) (225 µm region counted per turn)

|     | Apical       | Middle       | Base         |
|-----|--------------|--------------|--------------|
| CTL | 68.0 ± 1.2   | 63.3 ± 1.9   | 60.6 ± 1.6   |
| DTR | 48.5 ± 0.4** | 41.2 ± 0.7** | 40.3 ± 0.3** |

tdTomato+ GER cells (225 µm region counted per turn)

|     | Apical       | Middle     | Base       |
|-----|--------------|------------|------------|
| CTL | 100.7 ± 5.6  | 84.7 ± 6.1 | 70.4 ± 9.0 |
| DTR | 111.6 ± 11.2 | 85.0 ± 1.5 | 75.6 ± 4.5 |

\*\*\*p<0.001, \*\*p<0.01, \*p<0.05

The mouse model used, method of cell ablation, EdU injection paradigm, age analyzed, and n value for all experiments are listed. Raw counts of double or triple labeled cells in each turn of the cochlea are presented as mean ± s.e.m.
